# Supplementary material for: Decrypting Molecular Mechanisms Involved in Counteracting Copper and Nickel Toxicity in Jack Pine (Pinus banksiana) Based on Transcriptomic Analysis
Source: MDPI journal article supplement (doi:10.3390/plants13071042), 2024-04-08
Supplement: s1 [file s1]

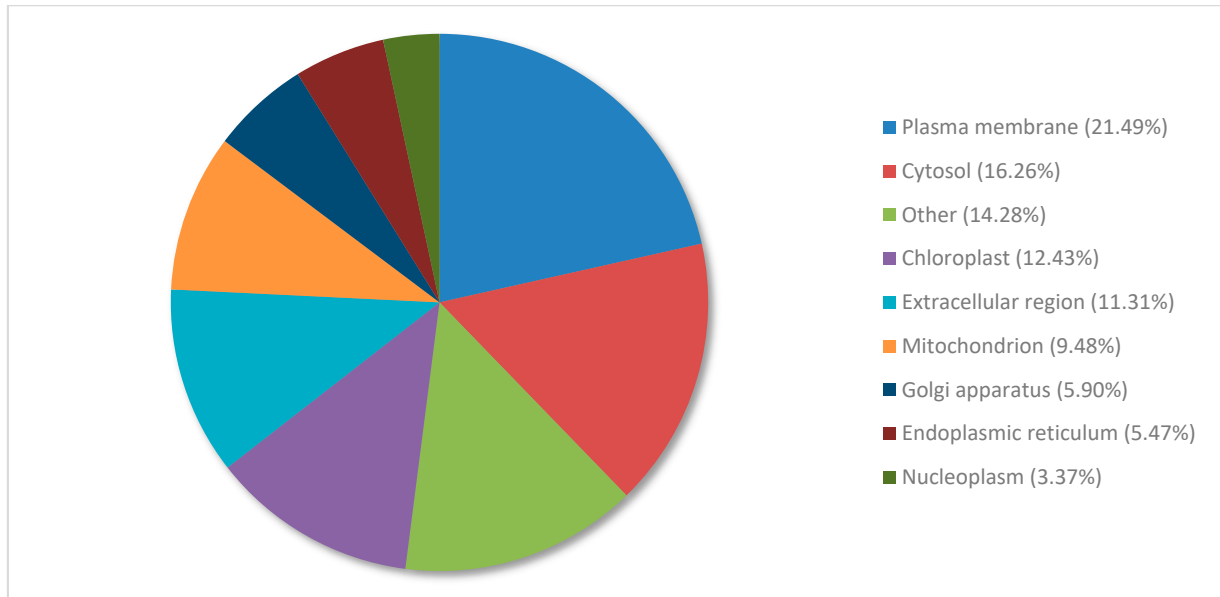

**Figure S1.** Percent distribution of differentially expressed genes (DEGs) for cell compartment localization when copper resistant (RG) and nickel resistant (RG) were compared. DEGs from copper RG compared to nickel RG were annotated and allocated to terms within the cellular compartment category using Omicsbox/Blast2GO. Terms that had a total percentage of expressed genes lower than 2% were collectively categorized into the term “other.”

**Table S1.** Damage rating scale and plant classification based on reaction to nickel and copper treatments.

| <b>% of Leaf area with chlorosis/necrosis</b> | <b>Damage Rating</b> | <b>Genotype Classification</b> |
|-----------------------------------------------|----------------------|--------------------------------|
| 0-10                                          | 1                    | Resistant (RG)                 |
| 10-20                                         | 2                    |                                |
| 20-30                                         | 3                    |                                |
| 30-40                                         | 4                    | Moderately Susceptible (MSG)   |
| 40-50                                         | 5                    |                                |
| 50-60                                         | 6                    |                                |
| 60-70                                         | 7                    | Susceptible (SG)               |
| 70-80                                         | 8                    |                                |
| > 80                                          | 9                    |                                |

**Table S2.** Top 108 upregulated genes in copper RG in comparison to Nickel RG in *Pinus banksiana*

| Rank | Gene ID               | Cu<br>Res1 | Cu<br>Res2 | Cu<br>Res3 | Ni<br>Res1 | Ni<br>Res2 | Ni<br>Res3 | logFC | Adj. P.<br>value | UniProt Description                                                                                                                        |
|------|-----------------------|------------|------------|------------|------------|------------|------------|-------|------------------|--------------------------------------------------------------------------------------------------------------------------------------------|
| 0    | TRINITY_DN2085_c0_g1  | 29.21      | 82.28      | 46.17      | 0.34       | 0.57       | 0.14       | 7.793 | 7.10E-05         | Predicted Protein                                                                                                                          |
| 1    | TRINITY_DN1891_c0_g2  | 51.01      | 52.45      | 17.61      | 0.04       | 2.06       | 0.7        | 7.247 | 0.000114         | Predicted Protein                                                                                                                          |
| 2    | TRINITY_DN8469_c0_g1  | 43.02      | 275.4      | 201.9      | 1.33       | 8.3        | 0.46       | 6.863 | 6.98E-05         | Acid phosphatase 1, EC 3.1.3.2 (Acase-1(1))                                                                                                |
| 3    | TRINITY_DN1979_c0_g1  | 32.13      | 43.51      | 47.01      | 0.21       | 3.16       | 0.33       | 6.702 | 5.45E-06         | Predicted Protein                                                                                                                          |
| 4    | TRINITY_DN4373_c0_g1  | 35.55      | 56.98      | 13.12      | 0.54       | 0.5        | 0.36       | 6.595 | 8.44E-05         | Predicted Protein                                                                                                                          |
| 5    | TRINITY_DN5_c0_g1     | 18.7       | 16.84      | 12.27      | 0.1        | 0.8        | 0.23       | 6.538 | 0.000106         | Pleiotropic drug resistance protein 1 (NtPDR1)                                                                                             |
| 6    | TRINITY_DN5_c0_g1     | 18.7       | 16.84      | 12.27      | 0.1        | 0.8        | 0.23       | 6.538 | 0.000106         | ABC transporter G family member 32, ABC transporter ABCG32, AtABCG32 (Pleiotropic drug resistance protein 4) (Protein PERMEABLE CUTICLE 1) |
| 7    | TRINITY_DN5_c0_g1     | 18.7       | 16.84      | 12.27      | 0.1        | 0.8        | 0.23       | 6.538 | 0.000106         | ABC transporter G family member 36, OsABCG36 (Pleiotropic drug resistance protein 9, OsPDR9)                                               |
| 8    | TRINITY_DN5_c0_g1     | 18.7       | 16.84      | 12.27      | 0.1        | 0.8        | 0.23       | 6.538 | 0.000106         | Pleiotropic drug resistance protein 1 (NpPDR1)                                                                                             |
| 9    | TRINITY_DN5_c0_g1     | 18.7       | 16.84      | 12.27      | 0.1        | 0.8        | 0.23       | 6.538 | 0.000106         | ABC transporter G family member 44, OsABCG44 (Pleiotropic drug resistance protein 17, OsPDR17)                                             |
| 10   | TRINITY_DN5_c0_g1     | 18.7       | 16.84      | 12.27      | 0.1        | 0.8        | 0.23       | 6.538 | 0.000106         | ABC transporter G family member 31, OsABCG31 (Pleiotropic drug resistance protein 6, OsPDR6)                                               |
| 11   | TRINITY_DN5_c0_g1     | 18.7       | 16.84      | 12.27      | 0.1        | 0.8        | 0.23       | 6.538 | 0.000106         | ABC transporter G family member 34, OsABCG34 (Pleiotropic drug resistance protein 10, OsPDR10)                                             |
| 12   | TRINITY_DN5742_c0_g1  | 25.47      | 76.4       | 14.17      | 0.6        | 1.07       | 0.41       | 6.162 | 5.17E-05         | Predicted Protein                                                                                                                          |
| 13   | TRINITY_DN59895_c0_g1 | 107.34     | 136.22     | 54.47      | 0.8        | 4.56       | 2.36       | 6.155 | 1.45E-06         | Predicted Protein                                                                                                                          |
| 14   | TRINITY_DN51306_c0_g1 | 32.05      | 61.43      | 35.69      | 0.53       | 0.7        | 1.91       | 6.153 | 1.48E-06         | Predicted Protein                                                                                                                          |
| 15   | TRINITY_DN8170_c0_g1  | 50.21      | 123.33     | 300.25     | 1.81       | 1.13       | 8.48       | 6.150 | 5.72E-05         | Predicted Protein                                                                                                                          |
| 16   | TRINITY_DN19606_c0_g1 | 31.77      | 21.11      | 20.22      | 0.5        | 1.66       | 0.29       | 5.866 | 4.22E-06         | Granule-bound starch synthase 1, chloroplastic/amyloplastic, EC 2.4.1.242 (Granule-bound starch synthase I, GBSS-I)                        |

|    |                        |        |         |        |       |       |        |       |          |                                                                                                         |
|----|------------------------|--------|---------|--------|-------|-------|--------|-------|----------|---------------------------------------------------------------------------------------------------------|
| 17 | TRINITY_DN6541_c0_g1   | 251.91 | 62.08   | 39.98  | 3.22  | 2.8   | 1.68   | 5.744 | 4.07E-05 | Heavy metal-associated isoprenylated plant protein 20, AtHIP20, AtHIP20                                 |
| 18 | TRINITY_DN6541_c0_g1   | 251.91 | 62.08   | 39.98  | 3.22  | 2.8   | 1.68   | 5.744 | 4.07E-05 | Heavy metal-associated isoprenylated plant protein 26, AtHIP26, AtHIP26 (Farnesylated protein 6, AtFP6) |
| 19 | TRINITY_DN47729_c0_g2  | 7.89   | 24.87   | 20.63  | 0.46  | 0.23  | 0.87   | 5.668 | 0.000146 | Predicted Protein                                                                                       |
| 20 | TRINITY_DN430_c0_g1    | 123.72 | 65.04   | 52.06  | 1.02  | 8.95  | 2.15   | 5.441 | 8.58E-06 | Cytochrome P450 86A22, EC 1.14.14.129 (Long-chain acyl-CoA omega-monooxygenase)                         |
| 21 | TRINITY_DN1790_c0_g1   | 9.55   | 18.4    | 18.66  | 0.23  | 2.08  | 0.31   | 5.440 | 4.00E-05 | Receptor-like protein kinase HSL1, EC 2.7.11.1 (Protein HAESA-LIKE1)                                    |
| 22 | TRINITY_DN1072_c0_g1   | 97.21  | 115.92  | 41.8   | 4.4   | 9.29  | 0.62   | 5.334 | 6.56E-05 | Predicted Protein                                                                                       |
| 23 | TRINITY_DN6055_c0_g1   | 18.79  | 22.98   | 21.77  | 0.56  | 1.18  | 0.81   | 5.330 | 5.78E-07 | Predicted Protein                                                                                       |
| 24 | TRINITY_DN6813_c0_g1   | 235.35 | 117.07  | 35.45  | 1.7   | 10.19 | 3.65   | 5.309 | 6.74E-05 | Predicted Protein                                                                                       |
| 25 | TRINITY_DN11710_c0_g2  | 150.88 | 92.2    | 20.39  | 1.17  | 7.66  | 2.13   | 5.304 | 0.000137 | Predicted Protein                                                                                       |
| 26 | TRINITY_DN63319_c0_g1  | 28.39  | 21.29   | 22.62  | 0.58  | 1.05  | 1.41   | 5.255 | 8.92E-07 | Predicted Protein                                                                                       |
| 27 | TRINITY_DN82353_c0_g1  | 13.94  | 23.06   | 17.36  | 0.87  | 0.98  | 0.45   | 5.156 | 2.89E-06 | Predicted Protein                                                                                       |
| 28 | TRINITY_DN48473_c0_g1  | 56.5   | 107.55  | 80.8   | 1.68  | 5.59  | 4.91   | 5.085 | 9.27E-07 | Predicted Protein                                                                                       |
| 29 | TRINITY_DN2130_c0_g1   | 22.32  | 44.82   | 44.69  | 2.2   | 1.09  | 1.68   | 5.050 | 4.23E-06 | Predicted Protein                                                                                       |
| 30 | TRINITY_DN1441_c0_g2   | 340.37 | 453.06  | 121.8  | 13.03 | 19.89 | 9.5    | 4.943 | 5.01E-06 | Predicted Protein                                                                                       |
| 31 | TRINITY_DN18305_c0_g1  | 12.58  | 17.34   | 7.24   | 0.21  | 1.24  | 0.93   | 4.934 | 4.54E-05 | Predicted Protein                                                                                       |
| 32 | TRINITY_DN13702_c0_g1  | 199.68 | 359.26  | 315.24 | 12.82 | 34.72 | 6.66   | 4.907 | 2.16E-06 | Predicted Protein                                                                                       |
| 33 | TRINITY_DN21077_c0_g1  | 104.2  | 111.9   | 29.03  | 1.46  | 13.71 | 2.65   | 4.883 | 8.29E-05 | Predicted Protein                                                                                       |
| 34 | TRINITY_DN6218_c0_g2   | 633.56 | 1516.57 | 853.55 | 35.82 | 29.45 | 111.35 | 4.880 | 6.20E-06 | Predicted Protein                                                                                       |
| 35 | TRINITY_DN234085_c0_g1 | 76.04  | 120.68  | 54.54  | 4.46  | 3.78  | 4.27   | 4.879 | 9.57E-07 | Predicted Protein                                                                                       |
| 36 | TRINITY_DN590_c0_g1    | 200.71 | 160.06  | 49.6   | 4.56  | 6.07  | 9.65   | 4.833 | 1.59E-05 | Predicted Protein                                                                                       |
| 37 | TRINITY_DN255785_c0_g2 | 10     | 9.31    | 5.83   | 0.27  | 0.7   | 0.49   | 4.799 | 4.24E-05 | Predicted Protein                                                                                       |
| 38 | TRINITY_DN107212_c0_g1 | 73.86  | 56.2    | 27.06  | 2.12  | 3.39  | 2.87   | 4.777 | 3.19E-06 | Predicted Protein                                                                                       |
| 39 | TRINITY_DN1091_c0_g1   | 107.98 | 82.18   | 33.01  | 3     | 8.72  | 2.4    | 4.706 | 1.41E-05 | Predicted Protein                                                                                       |
| 40 | TRINITY_DN4262_c0_g2   | 6.71   | 7.64    | 4.96   | 0.32  | 0.6   | 0.28   | 4.652 | 0.000126 | Predicted Protein                                                                                       |
| 41 | TRINITY_DN10240_c0_g1  | 9.94   | 8.21    | 10.71  | 0.46  | 0.21  | 1.82   | 4.629 | 8.89E-05 | Blue copper protein                                                                                     |
| 42 | TRINITY_DN103915_c0_g1 | 7.46   | 29.74   | 24.59  | 0.55  | 2.53  | 0.98   | 4.595 | 0.000104 | Predicted Protein                                                                                       |
| 43 | TRINITY_DN63319_c0_g2  | 57.41  | 39.86   | 23.94  | 2.04  | 2.44  | 2.92   | 4.591 | 3.30E-06 | Predicted Protein                                                                                       |

|    |                        |         |         |         |       |        |        |       |          |                                                                                                                                                                 |
|----|------------------------|---------|---------|---------|-------|--------|--------|-------|----------|-----------------------------------------------------------------------------------------------------------------------------------------------------------------|
| 44 | TRINITY_DN5693_c0_g1   | 315.06  | 441.27  | 270.61  | 9.95  | 42.87  | 23.88  | 4.584 | 8.61E-07 | Predicted Protein                                                                                                                                               |
| 45 | TRINITY_DN583_c0_g1    | 533.19  | 429.99  | 237.56  | 15.87 | 46.05  | 23.18  | 4.522 | 1.05E-06 | Photosystem II 22 kDa protein, chloroplastic (CP22)                                                                                                             |
| 46 | TRINITY_DN1967_c0_g1   | 16.28   | 29.89   | 19.85   | 1.39  | 0.84   | 2.46   | 4.504 | 1.16E-05 | Shikimate O-hydroxycinnamoyltransferase, EC 2.3.1.133 (Hydroxycinnamoyl transferase) (Hydroxycinnamoyl-Coenzyme A shikimate/quinat hydroxycinnamoyltransferase) |
| 47 | TRINITY_DN13260_c0_g1  | 11      | 18.27   | 23.07   | 0.85  | 0.78   | 1.93   | 4.502 | 1.44E-05 | Predicted Protein                                                                                                                                               |
| 48 | TRINITY_DN5923_c0_g1   | 5.55    | 9.36    | 11.52   | 0.49  | 1.08   | 0.31   | 4.481 | 5.26E-05 | Predicted Protein                                                                                                                                               |
| 49 | TRINITY_DN1544_c0_g1   | 13.52   | 20.43   | 14.75   | 0.59  | 2.03   | 1.18   | 4.444 | 4.04E-06 | Cellulose synthase-like protein E6, EC 2.4.1.- (OsCsIE6)                                                                                                        |
| 50 | TRINITY_DN5006_c0_g1   | 8.07    | 9.8     | 7.28    | 0.24  | 1.58   | 0.58   | 4.404 | 3.12E-05 | Cytochrome P450 750A1, EC 1.14.-.- (Cytochrome P450 CYPC)                                                                                                       |
| 51 | TRINITY_DN2833_c0_g1   | 8.64    | 16.5    | 9.06    | 0.6   | 0.73   | 1.13   | 4.401 | 1.47E-05 | Predicted Protein                                                                                                                                               |
| 52 | TRINITY_DN139958_c0_g1 | 17.76   | 14.28   | 10.19   | 1.67  | 1.29   | 0.42   | 4.399 | 2.89E-05 | Predicted Protein                                                                                                                                               |
| 53 | TRINITY_DN5325_c0_g1   | 7.04    | 6.54    | 4.79    | 0.32  | 0.54   | 0.49   | 4.393 | 6.94E-05 | Predicted Protein                                                                                                                                               |
| 54 | TRINITY_DN2317_c0_g1   | 51.56   | 73.8    | 37.5    | 3.73  | 3.38   | 4.66   | 4.376 | 1.82E-06 | Predicted Protein                                                                                                                                               |
| 55 | TRINITY_DN4110_c0_g1   | 10.72   | 17.48   | 18.17   | 0.75  | 0.9    | 2      | 4.356 | 1.17E-05 | Predicted Protein                                                                                                                                               |
| 56 | TRINITY_DN792_c0_g2    | 397.04  | 322.71  | 190.6   | 14.08 | 73.46  | 10.46  | 4.349 | 2.23E-05 | Granule-bound starch synthase 1, chloroplastic/amyloplastic, EC 2.4.1.242 (Granule-bound starch synthase I, GBSS-I)                                             |
| 57 | TRINITY_DN3113_c0_g1   | 19.55   | 36.23   | 25.85   | 3.29  | 2.48   | 1.02   | 4.291 | 1.41E-05 | Predicted Protein                                                                                                                                               |
| 58 | TRINITY_DN62635_c0_g1  | 11.04   | 20.42   | 16.53   | 1.01  | 1.74   | 1.02   | 4.276 | 4.59E-06 | Predicted Protein                                                                                                                                               |
| 59 | TRINITY_DN20024_c0_g1  | 1387.36 | 3245.98 | 1849.75 | 109   | 181.45 | 219.45 | 4.259 | 8.19E-07 | Predicted Protein                                                                                                                                               |
| 60 | TRINITY_DN51306_c2_g1  | 456.91  | 1001.17 | 567.06  | 33.89 | 34.09  | 122.11 | 4.241 | 1.65E-05 | Predicted Protein                                                                                                                                               |
| 61 | TRINITY_DN452_c1_g1    | 7.49    | 12.56   | 6.92    | 0.27  | 1.63   | 0.82   | 4.237 | 4.90E-05 | Receptor protein-tyrosine kinase CEPR1, EC 2.7.10.1 (Protein C-TERMINALLY ENCODED PEPTIDE RECEPTOR 1) (Protein XYLEM INTERMIXED WITH PHLOEM 1)                  |
| 62 | TRINITY_DN452_c1_g1    | 7.49    | 12.56   | 6.92    | 0.27  | 1.63   | 0.82   | 4.237 | 4.90E-05 | Leucine-rich repeat receptor-like kinase protein SUNN, EC 2.7.11.1 (Protein SUPER NUMERIC NODULES)                                                              |

|    |                        |        |        |        |       |       |       |       |          |                                                                                                                                                             |
|----|------------------------|--------|--------|--------|-------|-------|-------|-------|----------|-------------------------------------------------------------------------------------------------------------------------------------------------------------|
| 63 | TRINITY_DN13950_c0_g1  | 8.91   | 12.29  | 10.7   | 0.56  | 2.45  | 0.46  | 4.217 | 2.52E-05 | Predicted Protein                                                                                                                                           |
| 64 | TRINITY_DN8956_c0_g1   | 22.9   | 32.53  | 59.54  | 3.34  | 3.17  | 2.24  | 4.206 | 1.00E-05 | Predicted Protein                                                                                                                                           |
| 65 | TRINITY_DN5557_c0_g1   | 351.25 | 695.93 | 342.88 | 24.36 | 46.66 | 44.49 | 4.195 | 8.54E-07 | Fructose-bisphosphate aldolase 2, chloroplastic, AtFBA2, EC 4.1.2.13                                                                                        |
| 66 | TRINITY_DN5557_c0_g1   | 351.25 | 695.93 | 342.88 | 24.36 | 46.66 | 44.49 | 4.195 | 8.54E-07 | Fructose-bisphosphate aldolase, chloroplastic, EC 4.1.2.13                                                                                                  |
| 67 | TRINITY_DN5557_c0_g1   | 351.25 | 695.93 | 342.88 | 24.36 | 46.66 | 44.49 | 4.195 | 8.54E-07 | Fructose-bisphosphate aldolase 3, chloroplastic, AtFBA3, EC 4.1.2.13 (Protein PIGMENT DEFECTIVE 345)                                                        |
| 68 | TRINITY_DN5557_c0_g1   | 351.25 | 695.93 | 342.88 | 24.36 | 46.66 | 44.49 | 4.195 | 8.54E-07 | Fructose-bisphosphate aldolase, chloroplastic, EC 4.1.2.13 (Chloroplastic aldolase, AldP)                                                                   |
| 69 | TRINITY_DN13626_c0_g1  | 57.47  | 45.59  | 25.35  | 1.36  | 6.65  | 4.7   | 4.191 | 1.95E-05 | Predicted Protein                                                                                                                                           |
| 70 | TRINITY_DN5309_c0_g1   | 7.16   | 12.51  | 6.03   | 0.32  | 0.99  | 1.13  | 4.179 | 4.72E-05 | Probable E3 ubiquitin-protein ligase RHY1A, EC 2.3.2.27 (RING-H2 finger Y1a) (RING-H2 zinc finger protein RHY1a) (RING-type E3 ubiquitin transferase RHY1A) |
| 71 | TRINITY_DN125498_c1_g1 | 121.27 | 373.21 | 247.23 | 9.74  | 17.65 | 44.82 | 4.123 | 4.22E-05 | Predicted Protein                                                                                                                                           |
| 72 | TRINITY_DN963_c0_g2    | 69.63  | 60.55  | 89.57  | 3.21  | 19.61 | 4.19  | 4.110 | 1.57E-05 | Metal-nicotianamine transporter YSL3 (Protein YELLOW STRIPE LIKE 3, AtYSL3)                                                                                 |
| 73 | TRINITY_DN963_c0_g2    | 69.63  | 60.55  | 89.57  | 3.21  | 19.61 | 4.19  | 4.110 | 1.57E-05 | Probable metal-nicotianamine transporter YSL7 (Protein YELLOW STRIPE LIKE 7, AtYSL7)                                                                        |
| 74 | TRINITY_DN963_c0_g2    | 69.63  | 60.55  | 89.57  | 3.21  | 19.61 | 4.19  | 4.110 | 1.57E-05 | Probable metal-nicotianamine transporter YSL12 (Protein YELLOW STRIPE LIKE 12, OsYSL12)                                                                     |
| 75 | TRINITY_DN963_c0_g2    | 69.63  | 60.55  | 89.57  | 3.21  | 19.61 | 4.19  | 4.110 | 1.57E-05 | Probable metal-nicotianamine transporter YSL14 (Protein YELLOW STRIPE LIKE 14, OsYSL14)                                                                     |
| 76 | TRINITY_DN963_c0_g2    | 69.63  | 60.55  | 89.57  | 3.21  | 19.61 | 4.19  | 4.110 | 1.57E-05 | Probable metal-nicotianamine transporter YSL11 (Protein YELLOW STRIPE LIKE 11, OsYSL11)                                                                     |
| 77 | TRINITY_DN963_c0_g2    | 69.63  | 60.55  | 89.57  | 3.21  | 19.61 | 4.19  | 4.110 | 1.57E-05 | Probable metal-nicotianamine transporter YSL9 (Protein YELLOW STRIPE LIKE 9, OsYSL9)                                                                        |

|    |                       |       |       |       |      |       |       |       |          |                                                                                            |
|----|-----------------------|-------|-------|-------|------|-------|-------|-------|----------|--------------------------------------------------------------------------------------------|
| 78 | TRINITY_DN963_c0_g2   | 69.63 | 60.55 | 89.57 | 3.21 | 19.61 | 4.19  | 4.110 | 1.57E-05 | Probable metal-nicotianamine transporter YSL16 (Protein YELLOW STRIPE LIKE 16, OsYSL16)    |
| 79 | TRINITY_DN52249_c0_g3 | 7.28  | 5.78  | 4.03  | 0.21 | 1.21  | 0.51  | 4.088 | 0.000135 | Predicted Protein                                                                          |
| 80 | TRINITY_DN3604_c0_g1  | 5.48  | 6.5   | 4.61  | 0.29 | 1.04  | 0.41  | 4.075 | 6.63E-05 | Predicted Protein                                                                          |
| 81 | TRINITY_DN1217_c0_g1  | 48.16 | 71.15 | 146   | 2.86 | 8.85  | 14.44 | 4.074 | 5.54E-05 | Putative anthocyanidin reductase, GbANR, EC 1.3.1.-                                        |
| 82 | TRINITY_DN6386_c0_g1  | 11.97 | 34.03 | 18.9  | 1.71 | 0.92  | 3.86  | 4.059 | 0.000125 | Predicted Protein                                                                          |
| 83 | TRINITY_DN26976_c0_g1 | 82.95 | 53.31 | 76.71 | 1.91 | 16.63 | 8.7   | 4.054 | 4.59E-05 | Aspartyl protease family protein At5g10770, EC 3.4.23.-                                    |
| 84 | TRINITY_DN26976_c0_g1 | 82.95 | 53.31 | 76.71 | 1.91 | 16.63 | 8.7   | 4.054 | 4.59E-05 | Protein ASPARTIC PROTEASE IN GUARD CELL 1, AtASPG1, EC 3.4.23.-                            |
| 85 | TRINITY_DN10188_c0_g1 | 7.31  | 6.61  | 3.43  | 0.4  | 0.82  | 0.4   | 4.048 | 0.000139 | Cytochrome P450 750A1, EC 1.14.-.- (Cytochrome P450 CYPC)                                  |
| 86 | TRINITY_DN5205_c0_g1  | 48.67 | 71.45 | 57.26 | 2.98 | 7.51  | 7.24  | 4.046 | 1.56E-06 | Predicted Protein                                                                          |
| 87 | TRINITY_DN224_c0_g1   | 15.09 | 15.45 | 6.33  | 0.48 | 1.72  | 1.63  | 4.031 | 6.75E-05 | Subtilisin-like serine-protease S, SbtS, Subtilase S, EC 3.4.21.-                          |
| 88 | TRINITY_DN224_c0_g1   | 15.09 | 15.45 | 6.33  | 0.48 | 1.72  | 1.63  | 4.031 | 6.75E-05 | Subtilisin-like protease SBT3.3, EC 3.4.21.- (Subtilase subfamily 3 member 3, AtSBT3.3)    |
| 89 | TRINITY_DN224_c0_g1   | 15.09 | 15.45 | 6.33  | 0.48 | 1.72  | 1.63  | 4.031 | 6.75E-05 | Subtilisin-like protease SBT3.5, EC 3.4.21.- (Subtilase subfamily 3 member 5, AtSBT3.5)    |
| 90 | TRINITY_DN224_c0_g1   | 15.09 | 15.45 | 6.33  | 0.48 | 1.72  | 1.63  | 4.031 | 6.75E-05 | Subtilisin-like protease SBT3.15, EC 3.4.21.- (Subtilase subfamily 3 member 15, AtSBT3.15) |
| 91 | TRINITY_DN1243_c0_g2  | 21.49 | 20.9  | 7.13  | 1.45 | 1.46  | 1.3   | 4.020 | 5.63E-05 | Predicted Protein                                                                          |
| 92 | TRINITY_DN3029_c0_g1  | 35.14 | 40.46 | 12.44 | 1.59 | 2.74  | 3.99  | 3.988 | 5.31E-05 | Predicted Protein                                                                          |
| 93 | TRINITY_DN54045_c0_g2 | 8.44  | 9.51  | 14.88 | 1.03 | 0.93  | 1.06  | 3.973 | 1.50E-05 | Predicted Protein                                                                          |
| 94 | TRINITY_DN5990_c0_g1  | 5.66  | 6.63  | 3.4   | 0.43 | 0.59  | 0.47  | 3.958 | 0.000133 | Predicted Protein                                                                          |
| 95 | TRINITY_DN2642_c0_g1  | 4.84  | 6.48  | 6.06  | 0.38 | 1.22  | 0.39  | 3.949 | 5.65E-05 | Predicted Protein                                                                          |
| 96 | TRINITY_DN3360_c0_g2  | 7.55  | 14.02 | 7.56  | 0.37 | 2.13  | 1.09  | 3.931 | 6.33E-05 | Predicted Protein                                                                          |
| 97 | TRINITY_DN28667_c0_g1 | 10.25 | 13.09 | 5.92  | 0.45 | 3.23  | 0.64  | 3.900 | 0.000142 | Predicted Protein                                                                          |
| 98 | TRINITY_DN1344_c0_g1  | 13.88 | 10.7  | 7.37  | 0.84 | 2.55  | 0.55  | 3.899 | 4.57E-05 | Mannose-1-phosphate guanylyltransferase 1, EC 2.7.7.13 (GDP-mannose pyrophosphorylase 1)   |

|            |                       |       |       |       |      |      |      |       |          |                                                                                                                                                                            |
|------------|-----------------------|-------|-------|-------|------|------|------|-------|----------|----------------------------------------------------------------------------------------------------------------------------------------------------------------------------|
|            |                       |       |       |       |      |      |      |       |          | (Protein CYTOKINESIS DEFECTIVE 1) (Protein EMBRYO DEFECTIVE 101) (Protein HYPERSENSITIVE TO AMMONIUM ION 1) (Protein SENSITIVE TO OZONE 1) (Protein VITAMIN C DEFECTIVE 1) |
| <b>99</b>  | TRINITY_DN7300_c0_g1  | 10.65 | 10.03 | 24.85 | 1.47 | 0.91 | 2.05 | 3.878 | 8.78E-05 | Predicted Protein                                                                                                                                                          |
| <b>100</b> | TRINITY_DN4544_c0_g1  | 32.45 | 29.29 | 20.57 | 1.27 | 2.8  | 6.6  | 3.873 | 3.56E-05 | Predicted Protein                                                                                                                                                          |
| <b>101</b> | TRINITY_DN3984_c0_g2  | 6.33  | 5.62  | 5.47  | 0.29 | 2.02 | 0.38 | 3.872 | 0.000121 | Predicted Protein                                                                                                                                                          |
| <b>102</b> | TRINITY_DN3497_c0_g1  | 6.98  | 11.31 | 5.89  | 1.03 | 0.97 | 0.49 | 3.871 | 4.60E-05 | Predicted Protein                                                                                                                                                          |
| <b>103</b> | TRINITY_DN35587_c0_g1 | 4.4   | 6.71  | 6.78  | 0.5  | 0.74 | 0.63 | 3.825 | 4.04E-05 | Glyoxylase I 4, AtGLXI-like;4, AtGLYI4                                                                                                                                     |
| <b>104</b> | TRINITY_DN26392_c0_g2 | 28.62 | 15.31 | 12.83 | 1.28 | 5.23 | 1.1  | 3.814 | 6.93E-05 | Predicted Protein                                                                                                                                                          |
| <b>105</b> | TRINITY_DN57465_c0_g1 | 6.53  | 8.2   | 4.79  | 0.31 | 1.82 | 0.64 | 3.813 | 9.59E-05 | Predicted Protein                                                                                                                                                          |
| <b>106</b> | TRINITY_DN262_c0_g2   | 8.8   | 20.03 | 10.55 | 1.16 | 1.57 | 1.39 | 3.788 | 2.18E-05 | Polygalacturonase ADPG2, AtADPG2, PG ADPG2, EC 3.2.1.15 (Pectinase ADPG2) (Protein ARABIDOPSIS DEHISCENCE ZONE POLYGALACTURONASE 2)                                        |
| <b>107</b> | TRINITY_DN262_c0_g2   | 8.8   | 20.03 | 10.55 | 1.16 | 1.57 | 1.39 | 3.788 | 2.18E-05 | Probable polygalacturonase Atlg80170, PG, EC 3.2.1.15 (Pectinase Atlg80170)                                                                                                |
| <b>108</b> | TRINITY_DN262_c0_g2   | 8.8   | 20.03 | 10.55 | 1.16 | 1.57 | 1.39 | 3.788 | 2.18E-05 | Polygalacturonase, PG, EC 3.2.1.15 (Pectinase)                                                                                                                             |



**Table S3.** Top 112 downregulated genes in copper RG in comparison to Nickel RG in *Pinus banksiana*

| Rank | Gene ID               | Cu<br>Res1 | Cu<br>Res2 | Cu<br>Res3 | Ni<br>Res1 | Ni<br>Res2 | Ni<br>Res3 | logFC   | Adj. P.<br>value        | UniProt Description                                                                                                                                     |
|------|-----------------------|------------|------------|------------|------------|------------|------------|---------|-------------------------|---------------------------------------------------------------------------------------------------------------------------------------------------------|
| 0    | TRINITY_DN43547_c0_g1 | 0          | 0          | 0          | 24.15      | 39.01      | 23.93      | -10.382 | 6.42E-05                | Predicted Protein                                                                                                                                       |
| 1    | TRINITY_DN1456_c0_g1  | 1.37       | 0          | 1.34       | 306.48     | 253.1      | 155.47     | -9.527  | 0.00012871 <sub>9</sub> | Predicted Protein                                                                                                                                       |
| 2    | TRINITY_DN2126_c0_g1  | 1.31       | 0.24       | 0.4        | 954.55     | 193.03     | 448.85     | -9.030  | 4.26E-05                | UDP-glycosyltransferase 75C1, Absciscic acid beta-glucosyltransferase, Indole-3-acetate beta-glucosyltransferase, SIUGT75C1, EC 2.4.1.121, EC 2.4.1.263 |
| 3    | TRINITY_DN5965_c0_g1  | 0.28       | 0.12       | 1.02       | 159.21     | 70.92      | 203.21     | -8.429  | 5.08E-05                | Predicted Protein                                                                                                                                       |
| 4    | TRINITY_DN5240_c1_g1  | 0.06       | 0.2        | 0.38       | 75.64      | 57.88      | 47.63      | -7.894  | 0.00013167 <sub>5</sub> | Predicted Protein                                                                                                                                       |
| 5    | TRINITY_DN2786_c0_g1  | 7.97       | 1.28       | 0.09       | 767.81     | 197.57     | 545.86     | -7.817  | 0.00014700 <sub>2</sub> | Predicted Protein                                                                                                                                       |
| 6    | TRINITY_DN7685_c0_g1  | 0.35       | 0.17       | 0.18       | 69.15      | 75.78      | 88.19      | -7.718  | 1.68E-05                | Predicted Protein                                                                                                                                       |
| 7    | TRINITY_DN3685_c0_g2  | 7.54       | 1.2        | 0.09       | 524.13     | 169.45     | 298.36     | -7.315  | 0.00014639 <sub>3</sub> | Copia protein (Gag-int-pol protein) [Cleaved into: Copia VLP protein; Copia protease, EC 3.4.23.- ]                                                     |
| 8    | TRINITY_DN2463_c0_g1  | 5.21       | 0.97       | 0.68       | 301.76     | 196.16     | 568.86     | -7.021  | 8.44E-06                | Predicted Protein                                                                                                                                       |
| 9    | TRINITY_DN2040_c0_g1  | 28.51      | 6          | 12.87      | 3943.91    | 1043.09    | 3644.25    | -6.950  | 1.04E-05                | Predicted Protein                                                                                                                                       |
| 10   | TRINITY_DN5795_c0_g1  | 13.6       | 5.09       | 0.4        | 753.52     | 420.03     | 412.9      | -6.580  | 5.36E-05                | Predicted Protein                                                                                                                                       |
| 11   | TRINITY_DN735_c0_g1   | 5.88       | 1.92       | 0.26       | 401.38     | 124.53     | 198.21     | -6.422  | 9.90E-05                | Predicted Protein                                                                                                                                       |
| 12   | TRINITY_DN41085_c0_g1 | 1.46       | 0.55       | 8.2        | 230.93     | 100.32     | 461.71     | -6.396  | 8.67E-05                | Predicted Protein                                                                                                                                       |
| 13   | TRINITY_DN5240_c0_g1  | 0.4        | 0.48       | 1.48       | 86.62      | 78.96      | 59.64      | -6.375  | 1.11E-06                | Protein TIFY 10b, OsTIFY10b (Jasmonate ZIM domain-containing protein 7, OsJAZ7) (OsJAZ6)                                                                |
| 14   | TRINITY_DN17_c0_g2    | 0.65       | 0.15       | 0.58       | 50.63      | 58.32      | 26.97      | -6.307  | 1.89E-05                | RING-H2 finger protein ATL60, EC 2.3.2.27 (RING-type E3 ubiquitin transferase ATL60)                                                                    |
| 15   | TRINITY_DN800_c1_g1   | 2.53       | 0.34       | 0.33       | 127.84     | 44.55      | 121.22     | -6.264  | 0.00010350 <sub>9</sub> | Predicted Protein                                                                                                                                       |
| 16   | TRINITY_DN1755_c0_g1  | 0.73       | 0.19       | 0.22       | 37.36      | 42.04      | 37.53      | -6.143  | 1.54E-05                | Predicted Protein                                                                                                                                       |
| 17   | TRINITY_DN1067_c0_g1  | 0.21       | 0.63       | 2.66       | 74.75      | 51.13      | 62.5       | -6.138  | 1.50E-05                | Predicted Protein                                                                                                                                       |

|    |                       |       |      |      |         |        |         |        |                 |                                                                                                                                                  |
|----|-----------------------|-------|------|------|---------|--------|---------|--------|-----------------|--------------------------------------------------------------------------------------------------------------------------------------------------|
| 18 | TRINITY_DN4963_c0_g1  | 1.2   | 1.08 | 0.26 | 107.91  | 63.25  | 101.25  | -6.114 | 6.05E-06        | Predicted Protein                                                                                                                                |
| 19 | TRINITY_DN3889_c0_g1  | 8.77  | 0.85 | 2.51 | 414.11  | 167.54 | 300.23  | -6.071 | 3.22E-05        | Predicted Protein                                                                                                                                |
| 20 | TRINITY_DN6289_c0_g1  | 0.34  | 0.08 | 0.38 | 23.79   | 21.01  | 21.41   | -5.988 | 0.00013507<br>2 | Predicted Protein                                                                                                                                |
| 21 | TRINITY_DN6111_c0_g1  | 0.47  | 0.11 | 0.98 | 29.31   | 29.12  | 29.02   | -5.932 | 1.49E-05        | Predicted Protein                                                                                                                                |
| 22 | TRINITY_DN4477_c0_g1  | 1.32  | 1.08 | 0.77 | 67.92   | 163.48 | 92.08   | -5.924 | 1.74E-07        | Predicted Protein                                                                                                                                |
| 23 | TRINITY_DN71807_c0_g1 | 0.75  | 0.09 | 1.03 | 29.61   | 23.8   | 49.04   | -5.903 | 8.02E-05        | Predicted Protein                                                                                                                                |
| 24 | TRINITY_DN971_c0_g1   | 0.32  | 0.18 | 3.12 | 40.71   | 30.9   | 35.98   | -5.891 | 3.15E-05        | 1-aminocyclopropane-1-carboxylate synthase 7, ACC synthase 7, EC 4.4.1.14 (S-adenosyl-L-methionine methylthioadenosine-lyase 7)                  |
| 25 | TRINITY_DN971_c0_g1   | 0.32  | 0.18 | 3.12 | 40.71   | 30.9   | 35.98   | -5.891 | 3.15E-05        | 1-aminocyclopropane-1-carboxylate synthase, ACC synthase, EC 1.4.-.-, EC 4.4.1.14 (S-adenosyl-L-methionine methylthioadenosine-lyase)            |
| 26 | TRINITY_DN971_c0_g1   | 0.32  | 0.18 | 3.12 | 40.71   | 30.9   | 35.98   | -5.891 | 3.15E-05        | 1-aminocyclopropane-1-carboxylate synthase 6, ACC synthase 6, EC 4.4.1.14 (S-adenosyl-L-methionine methylthioadenosine-lyase 6)                  |
| 27 | TRINITY_DN971_c0_g1   | 0.32  | 0.18 | 3.12 | 40.71   | 30.9   | 35.98   | -5.891 | 3.15E-05        | 1-aminocyclopropane-1-carboxylate synthase 3, ACC synthase 3, EC 4.4.1.14 (Le-ACS3, ACS-3) (S-adenosyl-L-methionine methylthioadenosine-lyase 3) |
| 28 | TRINITY_DN971_c0_g1   | 0.32  | 0.18 | 3.12 | 40.71   | 30.9   | 35.98   | -5.891 | 3.15E-05        | 1-aminocyclopropane-1-carboxylate synthase 1, ACC synthase 1, EC 4.4.1.14 (S-adenosyl-L-methionine methylthioadenosine-lyase)                    |
| 29 | TRINITY_DN756_c0_g1   | 7.06  | 0.88 | 8.25 | 578.57  | 195.91 | 235.86  | -5.769 | 7.82E-05        | Dirigent protein 21, AtDIR21                                                                                                                     |
| 30 | TRINITY_DN6061_c0_g1  | 3.75  | 2.9  | 7.44 | 355.22  | 178.84 | 637.66  | -5.730 | 1.01E-05        | Predicted Protein                                                                                                                                |
| 31 | TRINITY_DN1472_c0_g1  | 12.73 | 1.55 | 0.53 | 212.32  | 210.54 | 174.12  | -5.729 | 5.80E-05        | Triacylglycerol lipase OBL1, EC 3.1.1.- (Oil body lipase 1, NtOBL1)                                                                              |
| 32 | TRINITY_DN6866_c0_g1  | 0.23  | 0.29 | 1.89 | 32.98   | 20.01  | 40.66   | -5.649 | 4.37E-05        | Predicted Protein                                                                                                                                |
| 33 | TRINITY_DN5723_c0_g1  | 5.47  | 0.91 | 0.48 | 147.25  | 109.75 | 89.9    | -5.649 | 2.65E-05        | Predicted Protein                                                                                                                                |
| 34 | TRINITY_DN7784_c0_g1  | 7.88  | 7.39 | 4.37 | 322.86  | 341.39 | 1073.69 | -5.627 | 4.26E-06        | Predicted Protein                                                                                                                                |
| 35 | TRINITY_DN5965_c1_g1  | 53.22 | 6.07 | 6.47 | 1173.34 | 760.7  | 1106.06 | -5.627 | 2.34E-05        | Predicted Protein                                                                                                                                |

|    |                       |       |      |      |        |        |        |        |          |                                                                                                               |
|----|-----------------------|-------|------|------|--------|--------|--------|--------|----------|---------------------------------------------------------------------------------------------------------------|
| 36 | TRINITY_DN9734_c0_g1  | 0.08  | 0.49 | 1.59 | 23.73  | 24.47  | 17.56  | -5.551 | 5.09E-05 | Predicted Protein                                                                                             |
| 37 | TRINITY_DN565_c0_g1   | 2.22  | 1.22 | 1.18 | 93.13  | 68.83  | 155.62 | -5.423 | 3.99E-06 | Peroxidase 12, Atperox P12, EC 1.11.1.7 (ATP4a) (PRXR6)                                                       |
| 38 | TRINITY_DN565_c0_g1   | 2.22  | 1.22 | 1.18 | 93.13  | 68.83  | 155.62 | -5.423 | 3.99E-06 | Cationic peroxidase SPC4, EC 1.11.1.7                                                                         |
| 39 | TRINITY_DN3459_c0_g1  | 2.36  | 0.56 | 3.89 | 101.88 | 77.2   | 153.38 | -5.410 | 2.03E-05 | Predicted Protein                                                                                             |
| 40 | TRINITY_DN2419_c0_g1  | 0.45  | 0.26 | 1.32 | 30.69  | 23.95  | 31.41  | -5.361 | 1.25E-05 | Predicted Protein                                                                                             |
| 41 | TRINITY_DN350_c0_g2   | 1.67  | 1.44 | 1.31 | 130.63 | 158.57 | 38.54  | -5.351 | 1.57E-05 | Benzyl alcohol O-benzoyltransferase, EC 2.3.1.196 (Benzoyl coenzyme A:benzyl alcohol benzoyl transferase)     |
| 42 | TRINITY_DN1483_c0_g1  | 2.06  | 0.14 | 1.59 | 46.18  | 45.16  | 46.95  | -5.347 | 8.11E-05 | Predicted Protein                                                                                             |
| 43 | TRINITY_DN3428_c0_g2  | 11.13 | 4.13 | 5.23 | 540.1  | 213.89 | 516.93 | -5.345 | 1.14E-05 | Predicted Protein                                                                                             |
| 44 | TRINITY_DN38763_c0_g1 | 1.24  | 0.74 | 2.14 | 88.25  | 171.45 | 27.6   | -5.333 | 5.55E-05 | Glyoxylase I 4, AtGLXI-like;4, AtGLYI4                                                                        |
| 45 | TRINITY_DN4971_c0_g2  | 11.63 | 2.63 | 2.86 | 386.29 | 249.26 | 229.67 | -5.330 | 7.46E-06 | Predicted Protein                                                                                             |
| 46 | TRINITY_DN1869_c0_g1  | 0.2   | 0.42 | 0.39 | 17.82  | 15.6   | 24.1   | -5.277 | 6.23E-05 | Predicted Protein                                                                                             |
| 47 | TRINITY_DN6746_c0_g1  | 0.98  | 1.33 | 0.37 | 50.95  | 34.06  | 77.5   | -5.265 | 1.96E-05 | Predicted Protein                                                                                             |
| 48 | TRINITY_DN3022_c0_g2  | 0.68  | 0.44 | 0.73 | 35.78  | 28.02  | 41.18  | -5.261 | 5.46E-06 | Predicted Protein                                                                                             |
| 49 | TRINITY_DN709_c0_g1   | 0.43  | 0.17 | 0.44 | 22.94  | 16.65  | 13.69  | -5.231 | 0.000125 | Predicted Protein                                                                                             |
| 50 | TRINITY_DN14557_c0_g1 | 13.84 | 7.83 | 6.14 | 671.5  | 289.97 | 665.67 | -5.219 | 6.57E-06 | Linoleate 9S-lipoxygenase A, EC 1.13.11.58 (Lipoxygenase A)                                                   |
| 51 | TRINITY_DN703_c0_g1   | 0.68  | 0.39 | 0.13 | 26.88  | 23.74  | 22.23  | -5.206 | 6.39E-05 | Auxin-responsive protein SAUR32 (Protein ABOLISHED APICAL HOOK MAINTENANCE 1) (Protein SMALL AUXIN UP RNA 32) |
| 52 | TRINITY_DN9217_c0_g2  | 0.28  | 0.3  | 0.4  | 16.06  | 31.56  | 10.18  | -5.167 | 0.000108 | Predicted Protein                                                                                             |
| 53 | TRINITY_DN3069_c0_g1  | 6.25  | 3.02 | 1.51 | 310.77 | 133.21 | 112.57 | -5.095 | 2.97E-05 | Predicted Protein                                                                                             |
| 54 | TRINITY_DN37281_c0_g1 | 0.4   | 0.73 | 0.64 | 46.45  | 19.21  | 27.73  | -5.062 | 0.000061 | Predicted Protein                                                                                             |
| 55 | TRINITY_DN2454_c0_g2  | 0.58  | 0.38 | 0.49 | 24.25  | 22.33  | 25.85  | -5.023 | 7.54E-06 | Predicted Protein                                                                                             |
| 56 | TRINITY_DN883_c0_g1   | 3.03  | 2.1  | 3.18 | 207.9  | 49.7   | 228.58 | -5.004 | 0.000138 | Class V chitinase, AtChiC, EC 3.2.1.14, EC 3.2.1.200                                                          |
| 57 | TRINITY_DN883_c0_g1   | 3.03  | 2.1  | 3.18 | 207.9  | 49.7   | 228.58 | -5.004 | 0.000138 | Class V chitinase CHIT5b, MtCHIT5b, EC 3.2.1.14                                                               |
| 58 | TRINITY_DN9201_c0_g1  | 6.29  | 2.46 | 13.2 | 471.59 | 149.72 | 307.61 | -5.002 | 6.59E-05 | Predicted Protein                                                                                             |

|    |                        |       |      |      |        |        |        |        |          |                                                                                                                                              |
|----|------------------------|-------|------|------|--------|--------|--------|--------|----------|----------------------------------------------------------------------------------------------------------------------------------------------|
| 59 | TRINITY_DN3152_c0_g1   | 8.05  | 2.08 | 3.45 | 254.41 | 122.04 | 221.09 | -4.989 | 1.71E-05 | Predicted Protein                                                                                                                            |
| 60 | TRINITY_DN481_c0_g1    | 1.02  | 0.41 | 3.08 | 55.39  | 66.11  | 31.34  | -4.983 | 2.66E-05 | RING-H2 finger protein ATL2, EC 2.3.2.27 (Protein ARABIDOPSIS TOXICOS EN LEVADURA 2, Protein ATL2) (RING-type E3 ubiquitin transferase ATL2) |
| 61 | TRINITY_DN481_c0_g1    | 1.02  | 0.41 | 3.08 | 55.39  | 66.11  | 31.34  | -4.983 | 2.66E-05 | RING-H2 finger protein ATL60, EC 2.3.2.27 (RING-type E3 ubiquitin transferase ATL60)                                                         |
| 62 | TRINITY_DN12730_c0_g1  | 3.1   | 1.53 | 0.39 | 49.37  | 106.18 | 56.02  | -4.966 | 1.36E-05 | Predicted Protein                                                                                                                            |
| 63 | TRINITY_DN3537_c0_g1   | 0.97  | 0.36 | 0.32 | 29.67  | 31.28  | 18.67  | -4.945 | 2.13E-05 | Predicted Protein                                                                                                                            |
| 64 | TRINITY_DN36982_c0_g1  | 0.96  | 1.94 | 2.77 | 31.59  | 189.32 | 83.11  | -4.937 | 2.58E-05 | Predicted Protein                                                                                                                            |
| 65 | TRINITY_DN350_c0_g3    | 0.68  | 1.13 | 0.56 | 49.85  | 47.92  | 20.65  | -4.911 | 1.63E-05 | Benzyl alcohol O-benzoyltransferase, EC 2.3.1.196 (Benzoyl coenzyme A:benzyl alcohol benzoyl transferase)                                    |
| 66 | TRINITY_DN7061_c1_g1   | 12.73 | 4.47 | 0.85 | 158.35 | 218.82 | 172.81 | -4.899 | 5.55E-05 | Predicted Protein                                                                                                                            |
| 67 | TRINITY_DN34079_c0_g1  | 2.25  | 1.33 | 1.66 | 139.04 | 63.67  | 49.4   | -4.844 | 0.000024 | Predicted Protein                                                                                                                            |
| 68 | TRINITY_DN2420_c0_g1   | 2.42  | 0.46 | 0.45 | 35.9   | 23.83  | 61.64  | -4.820 | 0.000136 | Predicted Protein                                                                                                                            |
| 69 | TRINITY_DN2309_c2_g1   | 3.77  | 4    | 3.12 | 266.25 | 96.82  | 148.11 | -4.808 | 0.000015 | Predicted Protein                                                                                                                            |
| 70 | TRINITY_DN104547_c0_g1 | 7.3   | 2.88 | 3.17 | 238.4  | 83.01  | 249.46 | -4.753 | 5.79E-05 | Predicted Protein                                                                                                                            |
| 71 | TRINITY_DN2423_c0_g1   | 4.25  | 0.64 | 2.98 | 104.81 | 46.82  | 107.91 | -4.737 | 0.000133 | Protein TIFY 9 (Jasmonate ZIM domain-containing protein 10) (Protein JASMONATE-ASSOCIATED 1) (Protein JAZ10)                                 |
| 72 | TRINITY_DN2936_c0_g1   | 4.11  | 1.09 | 0.71 | 80.77  | 49.47  | 64.72  | -4.714 | 3.89E-05 | F-box protein Atlg67340                                                                                                                      |
| 73 | TRINITY_DN3428_c0_g1   | 8.15  | 5.52 | 8.95 | 405.93 | 189.91 | 322.41 | -4.701 | 5.99E-06 | Probable linoleate 9S-lipoxygenase 4, EC 1.13.11.58 (Root lipoxygenase)                                                                      |
| 74 | TRINITY_DN3428_c0_g1   | 8.15  | 5.52 | 8.95 | 405.93 | 189.91 | 322.41 | -4.701 | 5.99E-06 | Linoleate 9S-lipoxygenase A, EC 1.13.11.58 (Lipoxygenase A)                                                                                  |
| 75 | TRINITY_DN2679_c0_g1   | 0.64  | 0.51 | 0.33 | 25.2   | 13.44  | 26.94  | -4.690 | 0.000109 | Predicted Protein                                                                                                                            |
| 76 | TRINITY_DN1630_c0_g1   | 1.33  | 0.31 | 0.8  | 30.88  | 27.11  | 23.21  | -4.666 | 0.000025 | Predicted Protein                                                                                                                            |
| 77 | TRINITY_DN662_c0_g1    | 18.61 | 3.39 | 4.79 | 297.28 | 215.67 | 292.16 | -4.661 | 2.17E-05 | Potassium transporter 5 (OsHAK5)                                                                                                             |
| 78 | TRINITY_DN662_c0_g1    | 18.61 | 3.39 | 4.79 | 297.28 | 215.67 | 292.16 | -4.661 | 2.17E-05 | Potassium transporter 1 (OsHAK1)                                                                                                             |

|     |                        |       |       |       |        |        |         |        |          |                                                                                 |
|-----|------------------------|-------|-------|-------|--------|--------|---------|--------|----------|---------------------------------------------------------------------------------|
| 79  | TRINITY_DN11443_c0_g1  | 1.61  | 1.82  | 0.7   | 65.72  | 28.76  | 74.44   | -4.651 | 5.76E-05 | Predicted Protein                                                               |
| 80  | TRINITY_DN528_c0_g1    | 0.38  | 0.52  | 0.46  | 11.9   | 28.25  | 15.99   | -4.628 | 1.17E-05 | Phospholipase A1-Igamma1, chloroplastic, EC 3.1.1.- (DAD1-like lipase 4)        |
| 81  | TRINITY_DN528_c0_g1    | 0.38  | 0.52  | 0.46  | 11.9   | 28.25  | 15.99   | -4.628 | 1.17E-05 | Phospholipase A1-Ialpha2, chloroplastic, EC 3.1.1.- (DAD1-like lipase 5)        |
| 82  | TRINITY_DN528_c0_g1    | 0.38  | 0.52  | 0.46  | 11.9   | 28.25  | 15.99   | -4.628 | 1.17E-05 | Phospholipase A1-Igamma3, chloroplastic, EC 3.1.1.- (DAD1-like lipase 2)        |
| 83  | TRINITY_DN9407_c0_g1   | 5.03  | 1.34  | 1.61  | 57.25  | 111.91 | 98.46   | -4.605 | 5.9E-06  | Predicted Protein                                                               |
| 84  | TRINITY_DN2515_c0_g1   | 8.97  | 2.8   | 1.1   | 140.76 | 123.23 | 98.31   | -4.585 | 3.63E-05 | Probable disease resistance protein At5g04720                                   |
| 85  | TRINITY_DN5337_c0_g1   | 0.18  | 0.61  | 1.85  | 15.76  | 16.44  | 20.55   | -4.551 | 8.04E-05 | Predicted Protein                                                               |
| 86  | TRINITY_DN5340_c0_g1   | 3.12  | 0.37  | 0.34  | 27.6   | 47.12  | 22.31   | -4.546 | 0.000131 | Predicted Protein                                                               |
| 87  | TRINITY_DN16888_c0_g1  | 1.21  | 0.47  | 0.16  | 20.12  | 30.42  | 16.05   | -4.523 | 5.85E-05 | Predicted Protein                                                               |
| 88  | TRINITY_DN16040_c0_g1  | 2.49  | 0.68  | 0.76  | 39.04  | 44.31  | 36.54   | -4.500 | 1.05E-05 | Predicted Protein                                                               |
| 89  | TRINITY_DN345_c1_g1    | 22.4  | 4.62  | 15.75 | 490.53 | 255.64 | 488.01  | -4.464 | 4.82E-05 | Predicted Protein                                                               |
| 90  | TRINITY_DN7436_c0_g2   | 24.8  | 30.11 | 10.46 | 481.81 | 599.66 | 1125.65 | -4.460 | 4.88E-06 | Predicted Protein                                                               |
| 91  | TRINITY_DN22831_c0_g2  | 5.06  | 2.53  | 5.2   | 150.2  | 59.44  | 260.42  | -4.428 | 0.000135 | Predicted Protein                                                               |
| 92  | TRINITY_DN3878_c1_g1   | 1.79  | 0.87  | 1.35  | 39.5   | 57.78  | 30.4    | -4.396 | 3.72E-06 | Predicted Protein                                                               |
| 93  | TRINITY_DN9660_c0_g1   | 0.46  | 0.24  | 1.22  | 14.82  | 18.95  | 9.21    | -4.364 | 6.54E-05 | Predicted Protein                                                               |
| 94  | TRINITY_DN2724_c0_g1   | 3.12  | 1.88  | 2.84  | 84.24  | 77.44  | 75.63   | -4.332 | 1.53E-06 | Predicted Protein                                                               |
| 95  | TRINITY_DN750_c0_g1    | 15.85 | 2.67  | 2.14  | 135.54 | 192.95 | 114.14  | -4.325 | 6.22E-05 | Probable disease resistance protein At5g04720                                   |
| 96  | TRINITY_DN2509_c0_g1   | 0.27  | 0.73  | 1.18  | 12.41  | 14.6   | 25.02   | -4.270 | 0.000075 | Predicted Protein                                                               |
| 97  | TRINITY_DN8616_c0_g1   | 1.97  | 1.48  | 1.13  | 56     | 34.08  | 47.26   | -4.260 | 1.28E-05 | Predicted Protein                                                               |
| 98  | TRINITY_DN7743_c0_g2   | 1.28  | 0.39  | 0.61  | 25.31  | 13.79  | 23.91   | -4.258 | 0.000129 | Probable phospholipid hydroperoxide glutathione peroxidase, PHGPx, EC 1.11.1.12 |
| 99  | TRINITY_DN399_c0_g1    | 15.58 | 5.85  | 7.45  | 337.3  | 126.19 | 404.82  | -4.250 | 9.96E-05 | Predicted Protein                                                               |
| 100 | TRINITY_DN2157_c0_g1   | 5.52  | 6.21  | 4.61  | 301.86 | 102.86 | 127.49  | -4.250 | 4.57E-05 | Predicted Protein                                                               |
| 101 | TRINITY_DN9843_c0_g1   | 2.1   | 1.4   | 4.76  | 70.86  | 38.88  | 96.24   | -4.181 | 7.29E-05 | Predicted Protein                                                               |
| 102 | TRINITY_DN102451_c0_g1 | 0.86  | 0.49  | 0.5   | 10.88  | 15.85  | 28.2    | -4.144 | 6.49E-05 | Predicted Protein                                                               |

|     |                        |       |      |      |       |        |        |        |          |                                                                                                                           |
|-----|------------------------|-------|------|------|-------|--------|--------|--------|----------|---------------------------------------------------------------------------------------------------------------------------|
| 103 | TRINITY_DN1644_c0_g3   | 0.77  | 0.66 | 1.22 | 25.94 | 13.95  | 32.04  | -4.139 | 8.63E-05 | NAC transcription factor 56, AtNAC056 (NAC domain-containing protein 2, AtNAC2) (Protein NAC-REGULATED SEED MORPHOLOGY 1) |
| 104 | TRINITY_DN3401_c0_g1   | 2.04  | 0.88 | 1.07 | 37.44 | 30.11  | 31.61  | -4.072 | 1.42E-05 | Disease resistance protein L6 (NAD(+) hydrolase L6, EC 3.2.2.6) (NADP(+) hydrolase L6, EC 3.2.2.-)                        |
| 105 | TRINITY_DN3401_c0_g1   | 2.04  | 0.88 | 1.07 | 37.44 | 30.11  | 31.61  | -4.072 | 1.42E-05 | Disease resistance protein Roq1 (NAD(+) hydrolase RPV1, EC 3.2.2.6) (Recognition of XopQ 1 protein)                       |
| 106 | TRINITY_DN1002_c0_g1   | 1.9   | 2.6  | 5.47 | 69.19 | 51.5   | 114.83 | -4.055 | 0.000034 | Probable phospholipid hydroperoxide glutathione peroxidase, PHGPx, EC 1.11.1.12 (Salt-associated protein)                 |
| 107 | TRINITY_DN1002_c0_g1   | 1.9   | 2.6  | 5.47 | 69.19 | 51.5   | 114.83 | -4.055 | 0.000034 | Probable phospholipid hydroperoxide glutathione peroxidase, PHGPx, EC 1.11.1.12                                           |
| 108 | TRINITY_DN34284_c1_g1  | 0.82  | 2.53 | 4.23 | 57.32 | 47.31  | 45.66  | -4.044 | 4.39E-05 | Probable phospholipid hydroperoxide glutathione peroxidase, PHGPx, EC 1.11.1.12                                           |
| 109 | TRINITY_DN13745_c0_g1  | 14.93 | 3.08 | 2.83 | 115.9 | 156.73 | 125.21 | -4.027 | 4.08E-05 | Predicted Protein                                                                                                         |
| 110 | TRINITY_DN36614_c0_g1  | 2.31  | 0.47 | 0.58 | 16.13 | 30.43  | 23.06  | -4.002 | 6.45E-05 | Predicted Protein                                                                                                         |
| 111 | TRINITY_DN76829_c0_g1  | 0.6   | 0.75 | 2.06 | 16.59 | 19.19  | 35.57  | -4.001 | 6.46E-05 | Predicted Protein                                                                                                         |
| 112 | TRINITY_DN162544_c0_g1 | 7.49  | 3.93 | 1.44 | 58.14 | 156.51 | 81.13  | -3.986 | 3.16E-05 | Probable phospholipid hydroperoxide glutathione peroxidase, PHGPx, EC 1.11.1.12                                           |

**Table S4.** Top 40 downregulated genes in copper SG in comparison to nickel SG in *Pinus banksiana*

| Rank | Gene ID               | Cu<br>Sus1 | Cu<br>Sus2 | Cu<br>Sus3 | Ni<br>Sus1 | Ni<br>Sus2 | Ni<br>Sus3 | logFC    | Adj. P.<br>value | UniProt Description                                                    |
|------|-----------------------|------------|------------|------------|------------|------------|------------|----------|------------------|------------------------------------------------------------------------|
| 0    | TRINITY_DN343_c0_g1   | 1.96       | 1.42       | 0.92       | 54.19      | 45.61      | 75.54      | -5.26455 | 7.48E-06         | Probable disease resistance protein At4g33300                          |
| 1    | TRINITY_DN1105_c0_g1  | 3.27       | 4.87       | 2.07       | 76.5       | 72.45      | 109.99     | -4.74021 | 8.13E-07         | Probable calcium-binding protein CML24 (Calmodulin-like protein 24)    |
| 2    | TRINITY_DN1140_c1_g1  | 4.64       | 8.22       | 3.13       | 95.64      | 64.13      | 116.13     | -4.21256 | 7.05E-06         | Heavy metal-associated isoprenylated plant protein 39, AtHIP39         |
| 3    | TRINITY_DN9069_c0_g1  | 3.08       | 3.94       | 1.43       | 39         | 35.11      | 55.72      | -4.0072  | 7.49E-06         | Predicted Protein                                                      |
| 4    | TRINITY_DN26455_c0_g1 | 5.55       | 5.56       | 3.67       | 47.82      | 81.22      | 105.73     | -3.96197 | 1.86E-06         | Predicted Protein                                                      |
| 5    | TRINITY_DN709_c0_g1   | 3.48       | 4.83       | 1.97       | 36.9       | 41.46      | 63.36      | -3.84112 | 4.28E-06         | Predicted Protein                                                      |
| 6    | TRINITY_DN24318_c0_g1 | 4.75       | 2.79       | 4.67       | 40.3       | 50.05      | 80.73      | -3.79817 | 8.01E-06         | Predicted Protein                                                      |
| 7    | TRINITY_DN2118_c0_g1  | 5.31       | 19.73      | 5.94       | 91.04      | 111.37     | 142.16     | -3.79689 | 2.20E-06         | Predicted Protein                                                      |
| 8    | TRINITY_DN66111_c1_g1 | 14.78      | 24.19      | 24.59      | 172.94     | 234.1      | 371.3      | -3.66779 | 1.60E-06         | Predicted Protein                                                      |
| 9    | TRINITY_DN9317_c0_g1  | 9.85       | 29.45      | 5.37       | 142.89     | 125.63     | 137.64     | -3.56924 | 7.93E-06         | Predicted Protein                                                      |
| 10   | TRINITY_DN25789_c0_g1 | 5.35       | 15.72      | 3.93       | 67.56      | 76.93      | 92.73      | -3.54421 | 3.52E-06         | Predicted Protein                                                      |
| 11   | TRINITY_DN2751_c0_g1  | 12.73      | 8.43       | 4.46       | 77.66      | 76.97      | 116.69     | -3.4682  | 4.60E-06         | Predicted Protein                                                      |
| 12   | TRINITY_DN1481_c0_g1  | 31.61      | 46.43      | 12.53      | 248.24     | 432.11     | 226.95     | -3.44461 | 5.91E-06         | Predicted Protein                                                      |
| 13   | TRINITY_DN37281_c0_g1 | 6.17       | 13.07      | 6.21       | 74.35      | 73.03      | 101.82     | -3.42972 | 1.93E-06         | Predicted Protein                                                      |
| 14   | TRINITY_DN11462_c0_g1 | 15.98      | 31.57      | 16.82      | 122.24     | 278.4      | 208.28     | -3.29128 | 1.68E-06         | Predicted Protein                                                      |
| 15   | TRINITY_DN3306_c0_g2  | 18.25      | 34.56      | 13.19      | 154.79     | 169.1      | 263.27     | -3.27608 | 1.59E-06         | Calcium-binding protein KIC (KCBP-interacting calcium-binding protein) |
| 16   | TRINITY_DN4522_c0_g1  | 12.58      | 21.21      | 9.5        | 81.86      | 98.59      | 152.54     | -3.01301 | 3.71E-06         | Predicted Protein                                                      |
| 17   | TRINITY_DN729_c0_g1   | 85.61      | 37.04      | 35.87      | 381.71     | 394.83     | 348.76     | -2.92258 | 4.38E-06         | Alcohol dehydrogenase 2, EC 1.1.1.1                                    |
| 18   | TRINITY_DN729_c0_g1   | 85.61      | 37.04      | 35.87      | 381.71     | 394.83     | 348.76     | -2.92258 | 4.38E-06         | Alcohol dehydrogenase 1, EC 1.1.1.1 (ADH slow-allele)                  |
| 19   | TRINITY_DN41085_c0_g1 | 50.47      | 50.02      | 52.9       | 257.45     | 297.21     | 485.74     | -2.76064 | 2.45E-06         | Predicted Protein                                                      |
| 20   | TRINITY_DN3066_c1_g1  | 13.73      | 15.11      | 13.46      | 55.99      | 116.42     | 118.98     | -2.74976 | 6.97E-06         | Predicted Protein                                                      |

|    |                       |        |        |        |         |         |         |          |          |                                                                                                                    |
|----|-----------------------|--------|--------|--------|---------|---------|---------|----------|----------|--------------------------------------------------------------------------------------------------------------------|
| 21 | TRINITY_DN2515_c0_g1  | 42.66  | 64     | 22.61  | 203.34  | 269.87  | 276.58  | -2.66249 | 6.45E-07 | Probable disease resistance protein At5g04720                                                                      |
| 22 | TRINITY_DN1690_c0_g1  | 82.49  | 125.29 | 74.33  | 334.26  | 557.98  | 584.67  | -2.43231 | 2.73E-07 | Predicted Protein                                                                                                  |
| 23 | TRINITY_DN1454_c0_g1  | 36.11  | 69.11  | 23.97  | 190.96  | 205.3   | 220.09  | -2.42405 | 3.20E-06 | Probable disease resistance protein At4g33300                                                                      |
| 24 | TRINITY_DN1454_c0_g1  | 36.11  | 69.11  | 23.97  | 190.96  | 205.3   | 220.09  | -2.42405 | 3.20E-06 | Disease resistance protein ADR1 (Activated disease resistance protein 1)                                           |
| 25 | TRINITY_DN187_c0_g2   | 34.07  | 59.55  | 27.12  | 157.12  | 214.46  | 204.87  | -2.36432 | 8.35E-07 | Probable disease resistance protein At4g33300                                                                      |
| 26 | TRINITY_DN187_c0_g2   | 34.07  | 59.55  | 27.12  | 157.12  | 214.46  | 204.87  | -2.36432 | 8.35E-07 | Probable RNA-binding protein 19 (RNA-binding motif protein 19)                                                     |
| 27 | TRINITY_DN2581_c0_g1  | 73.03  | 104.45 | 74.62  | 307.26  | 360.65  | 549.82  | -2.30639 | 2.39E-06 | Ubiquitin-40S ribosomal protein S27a-1 [Cleaved into: Ubiquitin; 40S ribosomal protein S27a-1 ]                    |
| 28 | TRINITY_DN829_c0_g1   | 36.79  | 52.72  | 34.25  | 136.33  | 187.57  | 265.96  | -2.27764 | 4.73E-06 | Predicted Protein                                                                                                  |
| 29 | TRINITY_DN871_c0_g1   | 77.17  | 92.43  | 46.57  | 254.71  | 317.44  | 342.34  | -2.14567 | 5.09E-07 | Lipase-like PAD4, EC 2.3.1.- (Protein ENHANCED DISEASE SUSCEPTIBILITY 9) (Protein PHYTOALEXIN DEFICIENT 4, AtPAD4) |
| 30 | TRINITY_DN2157_c0_g1  | 68.38  | 76.54  | 36.2   | 215.2   | 233.04  | 270.04  | -2.06397 | 3.08E-06 | Predicted Protein                                                                                                  |
| 31 | TRINITY_DN13745_c0_g1 | 54.22  | 67.9   | 45.99  | 155.83  | 243.23  | 290.83  | -2.04992 | 2.93E-06 | Predicted Protein                                                                                                  |
| 32 | TRINITY_DN750_c0_g1   | 52.81  | 76.65  | 41.32  | 153.78  | 225.7   | 259.13  | -1.95617 | 3.05E-06 | Probable disease resistance protein At5g04720                                                                      |
| 33 | TRINITY_DN3793_c0_g1  | 366.62 | 499.73 | 371.86 | 1261.79 | 1399.25 | 1863.43 | -1.92323 | 3.49E-07 | Ubiquitin-40S ribosomal protein S27a-1 [Cleaved into: Ubiquitin; 40S ribosomal protein S27a-1 ]                    |
| 34 | TRINITY_DN3793_c0_g1  | 366.62 | 499.73 | 371.86 | 1261.79 | 1399.25 | 1863.43 | -1.92323 | 3.49E-07 | Polyubiquitin [Cleaved into: Ubiquitin ]                                                                           |
| 35 | TRINITY_DN1147_c0_g1  | 434.27 | 562.5  | 522.82 | 1377.47 | 1708.44 | 2534.14 | -1.92099 | 3.94E-06 | Polyubiquitin [Cleaved into: Ubiquitin ]                                                                           |
| 36 | TRINITY_DN1147_c0_g1  | 434.27 | 562.5  | 522.82 | 1377.47 | 1708.44 | 2534.14 | -1.92099 | 3.94E-06 | Ubiquitin-60S ribosomal protein L40 [Cleaved into: Ubiquitin; 60S ribosomal protein L40 (CEP52) ]                  |
| 37 | TRINITY_DN1147_c0_g1  | 434.27 | 562.5  | 522.82 | 1377.47 | 1708.44 | 2534.14 | -1.92099 | 3.94E-06 | Ubiquitin-40S ribosomal protein S27a-1 [Cleaved into: Ubiquitin; 40S ribosomal protein S27a-1 ]                    |



|           |                      |        |        |        |        |        |        |          |          |                                                                                |
|-----------|----------------------|--------|--------|--------|--------|--------|--------|----------|----------|--------------------------------------------------------------------------------|
| <b>38</b> | TRINITY_DN343_c0_g2  | 41.37  | 51.5   | 29.81  | 106.48 | 143.08 | 171.71 | -1.81963 | 7.75E-06 | Disease resistance protein ADR1<br>(Activated disease resistance<br>protein 1) |
| <b>39</b> | TRINITY_DN3050_c0_g1 | 94.65  | 79.26  | 53.16  | 190.01 | 257.33 | 260.83 | -1.67312 | 6.44E-06 | Predicted Protein                                                              |
| <b>40</b> | TRINITY_DN5095_c0_g1 | 139.06 | 125.09 | 124.73 | 305.36 | 385.7  | 349.35 | -1.44871 | 6.98E-06 | Predicted Protein                                                              |
